# Supplementary material for: Using the Storm Water Management Model to predict urban headwater stream hydrological response to climate and land cover change
Source: Copernicus journal article supplement (doi:10.5194/hess-17-4743-2013), 2013-12-03
Supplement: Supplementary file 1 [file hess-17-4743-2013-supplement.pdf]

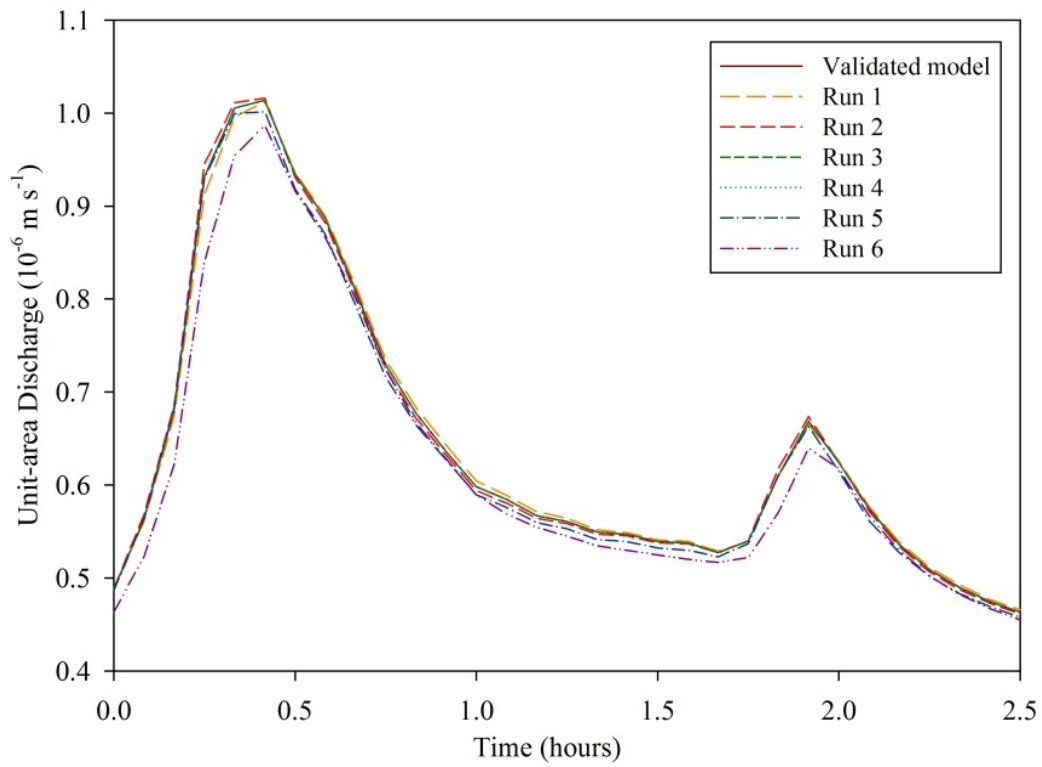

Figure 6. Hydrographs for uncertainty analyses based on variations in sub-catchment width and Manning's n (impervious surface and natural channels) for WS4.
